# Supplementary material for: Cost-effectiveness analysis of transcatheter aortic valve implantation versus surgical aortic valve replacement in patients with severe aortic stenosis at low risk of surgical mortality in Sweden
Source: PubMed Central journal article supplement (PMC11650470; doi:10.48101/ujms.v129.10741), 2024-11-07
Supplement: UJMS-129-10741-s1.pdf [file UJMS-129-10741-s1.pdf]

## Supplementary material

**Table S1.** Probabilities of clinical events used in the model.

| Clinical events                                                                                          | TAVI<br>with SAPIEN 3 | SAVR   | Source                                                                    |
|----------------------------------------------------------------------------------------------------------|-----------------------|--------|---------------------------------------------------------------------------|
| <b>At 30 days</b>                                                                                        |                       |        |                                                                           |
| Treated AF                                                                                               | 0.98%                 | 21.24% | SWEDEHEART registry<br>(2018-2020) <sup>6</sup>                           |
| New permanent pacemaker                                                                                  | 1.47%                 | 0.00%  |                                                                           |
| Rehospitalisation                                                                                        | 13.73%                | 58.11% |                                                                           |
| Disabling stroke                                                                                         | 1.47%                 | 1.53%  |                                                                           |
| Aortic reintervention                                                                                    | 0.00%                 | 0.07%  |                                                                           |
| Mortality                                                                                                | 0.98%                 | 1.45%  |                                                                           |
| <b>Monthly health states transition probabilities and intercurrent events between 30 days and 1 year</b> |                       |        |                                                                           |
| Alive and well → Treated AF                                                                              | 0.23%                 | 0.13%  | SWEDEHEART registry<br>(2018-2020) <sup>6</sup>                           |
| Alive and well → Disabling stroke                                                                        | 0.04%                 | 0.01%  |                                                                           |
| Treated AF → Disabling stroke                                                                            | 0.04%                 | 0.01%  |                                                                           |
| TIA                                                                                                      | 0.00%                 | 0.01%  |                                                                           |
| MI                                                                                                       | 0.00%                 | 0.00%  |                                                                           |
| Severe or life-threatening bleeding                                                                      | 0.00%                 | 0.12%  | SWEDEHEART registry<br>(2018-2020) <sup>6</sup><br>PARTNER 3 <sup>9</sup> |
| <b>Monthly health states transition probabilities after 1 year and beyond</b>                            |                       |        |                                                                           |
| Alive and well → Treated AF                                                                              | 0.00%                 | 0.00%  | SWEDEHEART registry<br>(2018-2020) <sup>6</sup>                           |
| Alive and well → Disabling stroke                                                                        | 0.00%                 | 0.00%  |                                                                           |
| Treated AF → Disabling stroke                                                                            | 0.00%                 | 0.00%  |                                                                           |
| <b>Events beyond 30 days (converted to monthly rates in calculations)</b>                                |                       |        |                                                                           |
| Rehospitalisation for first 12 months                                                                    | 43.94%                | 10.68% | SWEDEHEART registry<br>(2018-2020) <sup>6</sup>                           |
| Rehospitalisation from month 13 to month 24                                                              | 6.30%                 | 4.70%  |                                                                           |

|                                                                           |        |       |                                              |
|---------------------------------------------------------------------------|--------|-------|----------------------------------------------|
| Rehospitalisation from month 25 to month 36                               | 12.20% | 2.90% |                                              |
| Rehospitalisation from month 37 onwards                                   | 0.00%  | 0.00% |                                              |
| <b>Aortic reintervention</b> (converted to monthly rates in calculations) |        |       |                                              |
| Annual probability                                                        | 0.07%  | 0.07% | SWEDEHEART registry (2018-2020) <sup>6</sup> |

AF, atrial fibrillation; TIA, transient ischaemic stroke; MI, myocardial infarction; TAVI, transcatheter aortic valve implantation.

**Table S2.** Annual mortality risk for 'alive and well' and associated relative risk for other health states.

| <b>Annual mortality risk -<br/>alive and well (by age)</b> | <b>Males</b> | <b>Females</b> | <b>Monthly<br/>probability<br/>for TAVI</b> | <b>Monthly<br/>probabilit<br/>y for<br/>SAVR</b> | <b>Source</b>                                          |
|------------------------------------------------------------|--------------|----------------|---------------------------------------------|--------------------------------------------------|--------------------------------------------------------|
| 70 years                                                   | 1.57%        | 1.05%          | 0.11%                                       | 0.11%                                            | National Life<br>Tables Sweden<br>(2022) <sup>27</sup> |
| 71 years                                                   | 1.67%        | 1.11%          | 0.12%                                       | 0.12%                                            |                                                        |
| 72 years                                                   | 2.01%        | 1.34%          | 0.14%                                       | 0.14%                                            |                                                        |
| 73 years                                                   | 2.12%        | 1.50%          | 0.15%                                       | 0.15%                                            |                                                        |
| 74 years                                                   | 2.36%        | 1.71%          | 0.17%                                       | 0.17%                                            |                                                        |
| 75 years                                                   | 2.75%        | 1.81%          | 0.19%                                       | 0.19%                                            |                                                        |
| 76 years                                                   | 2.98%        | 2.01%          | 0.21%                                       | 0.21%                                            |                                                        |
| 77 years                                                   | 3.26%        | 2.32%          | 0.24%                                       | 0.24%                                            |                                                        |
| 78 years                                                   | 3.56%        | 2.53%          | 0.26%                                       | 0.26%                                            |                                                        |
| 79 years                                                   | 4.33%        | 2.92%          | 0.31%                                       | 0.31%                                            |                                                        |
| 80 years                                                   | 4.79%        | 3.36%          | 0.35%                                       | 0.35%                                            |                                                        |
| 81 years                                                   | 5.32%        | 3.66%          | 0.39%                                       | 0.39%                                            |                                                        |
| 82 years                                                   | 6.18%        | 4.47%          | 0.46%                                       | 0.46%                                            |                                                        |
| 83 years                                                   | 6.97%        | 5.11%          | 0.52%                                       | 0.52%                                            |                                                        |
| 84 years                                                   | 7.81%        | 5.69%          | 0.58%                                       | 0.58%                                            |                                                        |
| 85 years                                                   | 9.05%        | 6.47%          | 0.68%                                       | 0.68%                                            |                                                        |
| 86 years                                                   | 10.48%       | 7.67%          | 0.80%                                       | 0.80%                                            |                                                        |
| 87 years                                                   | 11.51%       | 8.71%          | 0.89%                                       | 0.89%                                            |                                                        |
| 88 years                                                   | 13.14%       | 9.96%          | 1.02%                                       | 1.02%                                            |                                                        |
| 89 years                                                   | 14.62%       | 10.91%         | 1.14%                                       | 1.14%                                            |                                                        |
| 90 years                                                   | 17.16%       | 12.84%         | 1.35%                                       | 1.35%                                            |                                                        |
| 91 years                                                   | 18.00%       | 14.19%         | 1.46%                                       | 1.46%                                            |                                                        |
| 92 years                                                   | 20.92%       | 16.73%         | 1.73%                                       | 1.73%                                            |                                                        |
| 93 years                                                   | 23.43%       | 18.16%         | 1.94%                                       | 1.94%                                            |                                                        |

|                                                                                                    |         |                                                                                                                                                        |       |       |  |
|----------------------------------------------------------------------------------------------------|---------|--------------------------------------------------------------------------------------------------------------------------------------------------------|-------|-------|--|
| 94 years                                                                                           | 25.20%  | 19.90%                                                                                                                                                 | 2.12% | 2.12% |  |
| 95 years                                                                                           | 27.27%  | 22.08%                                                                                                                                                 | 2.35% | 2.35% |  |
| 96 years                                                                                           | 29.74%  | 24.30%                                                                                                                                                 | 2.60% | 2.60% |  |
| 97 years                                                                                           | 32.36%  | 26.68%                                                                                                                                                 | 2.89% | 2.89% |  |
| 98 years                                                                                           | 35.12%  | 29.23%                                                                                                                                                 | 3.20% | 3.20% |  |
| 99 years                                                                                           | 38.02%  | 31.94%                                                                                                                                                 | 3.54% | 3.54% |  |
| 100 years                                                                                          | 41.04%  | 34.82%                                                                                                                                                 | 3.91% | 3.91% |  |
| <b>Relative risk of death (HR) associated with treated AF, disabling stroke and reintervention</b> |         |                                                                                                                                                        |       |       |  |
| Treated AF                                                                                         | HR=1.46 | Odutayo et al. <sup>28</sup>                                                                                                                           |       |       |  |
| Disabling stroke                                                                                   | HR=2.30 | Dennis et al. <sup>29</sup>                                                                                                                            |       |       |  |
| Aortic reintervention                                                                              | HR=2.21 | PARTNER 3 trial <sup>9</sup><br>Procedural deaths (0.4%) compared to monthly mortality risk of general mortality for 73 years old <sup>a</sup> (0.16%) |       |       |  |

<sup>a</sup> Average age of the PARTNER 3 cohort

AF, atrial fibrillation; HR, hazard ratio; SAVR, surgical aortic valve replacement; TAVI, transcatheter aortic valve implantation.

**Table S3.** Deterministic sensitivity analysis input parameters.

| <b>Parameter</b>                                                                   | <b>Base value</b> | <b>case</b> | <b>Lower value</b> | <b>Upper value</b> | <b>Lower (%)</b> | <b>Upper (%)</b> |
|------------------------------------------------------------------------------------|-------------------|-------------|--------------------|--------------------|------------------|------------------|
| Age, years                                                                         | 76                |             | 65                 | 85                 | 14.5%            | 11.8%            |
| Proportion male                                                                    | 52%               |             | 41.8%              | 62.6%              | 20.0%            | 20.0%            |
| Discount rate: costs (1–30 years)                                                  | 3.0%              |             | 2.4%               | 3.6%               | 20.0%            | 20.0%            |
| Discount rate: costs (after 30 years)                                              | 3.0%              |             | 2.4%               | 3.6%               | 20.0%            | 20.0%            |
| Discount rate: benefits (1–30 years)                                               | 3.0%              |             | 2.4%               | 3.6%               | 20.0%            | 20.0%            |
| Discount rate: benefits (after 30 years)                                           | 3.0%              |             | 2.4%               | 3.6%               | 20.0%            | 20.0%            |
| TAVI with SAPIEN 3: Mortality risk at 30 days                                      | 1.0%              |             | 0.8%               | 1.2%               | 20.0%            | 20.0%            |
| TAVI with SAPIEN 3: Risk of new onset of treated AF at 30 days                     | 1.0%              |             | 0.8%               | 1.2%               | 20.0%            | 20.0%            |
| TAVI with SAPIEN 3: Risk of new PP at 30 days                                      | 1.5%              |             | 1.2%               | 1.8%               | 20.0%            | 20.0%            |
| TAVI with SAPIEN 3: Risk of DS at 30 days                                          | 1.5%              |             | 1.2%               | 1.8%               | 20.0%            | 20.0%            |
| SAVR: Mortality risk at 30 days                                                    | 1.5%              |             | 1.2%               | 1.8%               | 20.0%            | 20.0%            |
| SAVR: Risk of new onset treated AF at 30 days                                      | 21.2%             |             | 16.9%              | 25.5%              | 20.0%            | 20.0%            |
| SAVR: Risk of new PP at 30 days                                                    | 0.0%              |             | 0.0%               | 0.0%               | NA               | NA               |
| SAVR: Risk of DS at 30 days                                                        | 1.5%              |             | 1.2%               | 1.8%               | 20.0%            | 20.0%            |
| TAVI with SAPIEN 3: Alive and well to treated AF (monthly transition after 1 year) | 0.0%              |             | 0.0%               | 0.0%               | NA               | NA               |

|                                                                          |      |      |      |       |        |
|--------------------------------------------------------------------------|------|------|------|-------|--------|
| TAVI w. SAPIEN 3: Alive and well to DS (monthly transition after 1 year) | 0.0% | 0.0% | 0.0% | NA    | NA     |
| TAVI w. SAPIEN 3: Treated AF to DS (monthly transition after 1 year)     | 0.0% | 0.0% | 0.0% | NA    | NA     |
| SAVR: Alive and well to treated AF (monthly transition after 1 year)     | 0.0% | 0.0% | 0.0% | NA    | NA     |
| SAVR: Alive and well to DS (monthly transition after 1 year)             | 0.0% | 0.0% | 0.0% | NA    | NA     |
| SAVR: Treated AF to DS (monthly transition after 1 year)                 | 0.0% | 0.0% | 0.0% | NA    | NA     |
| TAVI with SAPIEN 3 : Rehospitalisation multiplier                        | 1    | 0.8  | 1.2  | 20.0% | 20.0%  |
| SAVR: Rehospitalisation multiplier                                       | 1    | 0.8  | 1.2  | 20.0% | 20.0%  |
| TAVI with SAPIEN 3 : Reintervention multiplier                           | 1    | 0.8  | 1.2  | 20.0% | 20.0%  |
| SAVR: Reintervention multiplier                                          | 1    | 0.8  | 1.2  | 20.0% | 20.0%  |
| RR of death for treated AF                                               | 1.5  | 1.2  | 1.8  | 4.8%  | 5.5%   |
| RR of death with DS (month 1)                                            | 2.3  | 1.8  | 2.7  | 20.0% | 20.0%  |
| RR of death with DS (month 2+)                                           | 2.3  | 1.8  | 2.7  | 20.0% | 20.0%  |
| RR of death with reintervention TAVI with SAPIEN 3                       | 2.2  | 1.8  | 2.7  | 20.0% | 20.0%  |
| RR of death with reintervention SAVR                                     | 2.2  | 1.8  | 2.7  | 20.0% | 20.0%  |
| HR mortality vs SAVR: TAVI with SAPIEN 3                                 | 0.8  | 0.4  | 1.6  | 53.3% | 117.3% |
| Utility decrement: treated AF                                            | 0.08 | 0.07 | 0.10 | 20.0% | 20.0%  |
| Utility decrement: DS                                                    | 0.36 | 0.29 | 0.44 | 20.0% | 20.0%  |

|                                             |             |             |             |       |       |
|---------------------------------------------|-------------|-------------|-------------|-------|-------|
| Procedure cost: TAVI with SAPIEN 3          | 302 329 SEK | 241 863 SEK | 362 795 SEK | 20.0% | 20.0% |
| Procedure cost: SAVR                        | 244 750 SEK | 195 800 SEK | 293 700 SEK | 20.0% | 20.0% |
| AEs cost: TAVI with SAPIEN 3                | 0           | 0           | 311         | NA    | NA    |
| AEs cost: SAVR                              | 0           | 0           | 1 281       | NA    | NA    |
| AF cost: per month from month 2             | 89          | 71          | 66 673      | 20.0% | 20.0% |
| DS cost (month 1): per month                | 8 235       | 6 588       | 2 533       | 20.0% | 20.0% |
| DS cost (month 2+): per month               | 3 786       | 3 029       | 210 787     | 20.0% | 20.0% |
| Alive and well cost: per month (SAVR 2+)    | 38          | 30          | 50 705      | 20.0% | 20.0% |
| PP insertion cost                           | 7 841       | 6 273       | 9 858       | 20.0% | 20.0% |
| PP complications (per month)                | 56          | 44          | 4 930       | 20.0% | 20.0% |
| Hospitalisation cost TAVI with SAPIEN 3     | 3 093       | 2 474       | 9 858       | 20.0% | 20.0% |
| Hospitalisation costs SAVR                  | 3 093       | 2 474       | 4 930       | 20.0% | 20.0% |
| Reintervention cost with TAVI with SAPIEN 3 | 302 329     | 241 863     | 362 795     | 20.0% | 20.0% |
| Reintervention cost with SAVR               | 302 329     | 241 863     | 362 795     | 20.0% | 20.0% |

AE, adverse events; AF, atrial fibrillation; DS, disabling stroke; HR, hazard ratio; PP, permanent pacemaker; RR, relative risk; SAVR, surgical aortic valve replacement; TAVI, transcatheter aortic valve implantation.

**Table S4.** Probabilistic sensitivity analysis assumptions.

| Parameter                                              | Base case value | Distribution | Parameters                | Source                                       |
|--------------------------------------------------------|-----------------|--------------|---------------------------|----------------------------------------------|
| <b>TAVI with SAPIEN 3 – clinical events at 30 days</b> |                 |              |                           |                                              |
| All-cause mortality                                    | 0.98%           | Beta         | Alpha = 2 / Beta = 202    | SWEDEHEART registry (2018-2020) <sup>6</sup> |
| New onset of Treated AF                                | 0.98%           | Beta         | Alpha = 2 / Beta = 202    |                                              |
| New permanent pacemaker                                | 1.47%           | Beta         | Alpha = 3 / Beta = 201    |                                              |
| Rehospitalisation                                      | 13.73%          | Beta         | Alpha = 28 / Beta = 176   |                                              |
| Disabling stroke                                       | 1.47%           | Beta         | Alpha = 3 / Beta = 201    |                                              |
| Non-disabling stroke                                   | 0.60%           | Beta         | Alpha = 3 / Beta = 493    | PARTNER 3 trial <sup>9</sup>                 |
| TIA                                                    | 0.00%           | Beta         | Alpha = 0 / Beta = 204    | SWEDEHEART registry (2018-2020) <sup>6</sup> |
| MI                                                     | 0.00%           | Beta         | Alpha = 0 / Beta = 204    |                                              |
| Bleeding                                               | 4.90%           | Beta         | Alpha = 10 / Beta = 194   |                                              |
| AKI with renal replacement therapy                     | 0.00%           | Beta         | Alpha = 0 / Beta = 204    |                                              |
| Aortic reintervention                                  | 0.00%           | Beta         | Alpha = 0 / Beta = 204    |                                              |
| <b>SAVR – clinical events at 30 days</b>               |                 |              |                           |                                              |
| All-cause mortality                                    | 1.45%           | Beta         | Alpha = 20 / Beta = 1355  | SWEDEHEART registry (2018-2020) <sup>6</sup> |
| New onset of Treated AF                                | 21.24%          | Beta         | Alpha = 292 / Beta = 1083 |                                              |
| New permanent pacemaker                                | 0.00%           | Beta         | Alpha = 0 / Beta = 1375   |                                              |



|                                                                                          |         |       |                          |                                              |
|------------------------------------------------------------------------------------------|---------|-------|--------------------------|----------------------------------------------|
| Rehospitalisation                                                                        | 58.11%  | Beta  | Alpha = 733 / Beta = 576 |                                              |
| Disabling stroke                                                                         | 1.53%   | Beta  | Alpha = 21 / Beta = 1354 |                                              |
| Non-disabling stroke                                                                     | 1.98%   | Beta  | Alpha = 9 / Beta = 445   | PARTNER 3 trial <sup>9</sup>                 |
| TIA                                                                                      | 0.07%   | Beta  | Alpha = 1 / Beta = 1374  | SWEDEHEART registry (2018-2020) <sup>6</sup> |
| MI                                                                                       | 1.24%   | Beta  | Alpha = 17 / Beta = 1358 |                                              |
| Bleeding                                                                                 | 24.45%  | Beta  | Alpha = 111 / Beta = 343 | PARTNER 3 trial <sup>9</sup>                 |
| AKI with renal replacement therapy                                                       | 0.00%   | Beta  | Alpha = 0 / Beta = 1375  | SWEDEHEART registry (2018-2020) <sup>6</sup> |
| Aortic reintervention                                                                    | 0.07%   | Beta  | Alpha = 1 / Beta = 1374  |                                              |
| <b>TAVI with SAPIEN 3 – Clinical events from 30 days to 1 year (monthly probability)</b> |         |       |                          |                                              |
| TIA                                                                                      | 0.00%   | Beta  | Alpha = 0 / Beta = 204   | SWEDEHEART registry (2018-2020) <sup>6</sup> |
| MI                                                                                       | 0.00%   | Beta  | Alpha = 0 / Beta = 204   |                                              |
| Severe/life-threatening bleeding                                                         | 0.00%   | Beta  | Alpha = 0 / Beta = 204   |                                              |
| Rehospitalisation rate                                                                   | 43.94 % | Gamma | SD = 0.04 (assumption)   |                                              |
| <b>SAVR – Clinical events from 30 days to 1 year (monthly probability)</b>               |         |       |                          |                                              |
| TIA                                                                                      | 0.01%   | Beta  | Alpha = 1 / Beta = 1374  | SWEDEHEART registry (2018-2020) <sup>6</sup> |
| MI                                                                                       | 0.00%   | Beta  | Alpha = 0 / Beta = 1375  |                                              |
| Severe/life-threatening bleeding                                                         | 0.12%   | Beta  | Alpha = 6 / Beta = 448   | PARTNER 3 trial <sup>9</sup>                 |

|                                                                                                   |         |       |                             |                                              |
|---------------------------------------------------------------------------------------------------|---------|-------|-----------------------------|----------------------------------------------|
| Rehospitalisation rate                                                                            | 10.68 % | Gamma | SD = 0.01% (assumption)     | SWEDEHEART registry (2018-2020) <sup>6</sup> |
| <b>TAVI with SAPIEN 3 – Monthly transition probabilities (Month 1 to 12 and Month 13 onwards)</b> |         |       |                             |                                              |
| Alive and well to Treated AF – Month 1 to Month 12                                                | 0.23%   | Beta  | Alpha = 5 / Beta = 199      | SWEDEHEART registry (2018-2020) <sup>6</sup> |
| Alive and well to Treated AF – Month 13 onwards                                                   | 0.00%   | Beta  | Alpha = 0 / Beta = 204      |                                              |
| Alive and well to Disabling stroke– Month 1 to Month 12                                           | 0.041%  | Beta  | Alpha = 1/ Beta = 203       |                                              |
| Alive and well to Disabling stroke– Month 13 onwards                                              | 0.00%   | Beta  | Alpha = 0 / Beta = 204      |                                              |
| Treated AF to Disabling stroke– Month 1 to Month 12                                               | 0.04%   | Beta  | Alpha = 55 / Beta = 587.812 |                                              |
| Treated AF to Disabling stroke– Month 13 onwards                                                  | 0.00%   | Beta  | Alpha = 0 / Beta = 204      |                                              |
| <b>SAVR – Monthly transition probabilities (Month 1 to 12 and Month 13 onwards)</b>               |         |       |                             |                                              |
| Alive and well to Treated AF – Month 1 to Month 12                                                | 0.13%   | Beta  | Alpha = 19 / Beta = 1356    | SWEDEHEART registry (2018-2020) <sup>6</sup> |
| Alive and well to Treated AF – Month 13 Onwards                                                   | 0.00%   | Beta  | Alpha = 0 / Beta = 1375     |                                              |
| Alive and well to Disabling stroke– Month 1 to Month 12                                           | 0.006%  | Beta  | Alpha = 1 / Beta = 1374     |                                              |

|                                                                                                   |       |           |                           |                                                                                                                                                        |
|---------------------------------------------------------------------------------------------------|-------|-----------|---------------------------|--------------------------------------------------------------------------------------------------------------------------------------------------------|
| Alive and well to Disabling stroke– Month 13 onwards                                              | 0.00% | Beta      | Alpha = 0 / Beta = 1375   |                                                                                                                                                        |
| Treated AF to Disabling stroke– Month 1 to Month 12                                               | 0.01% | Beta      | Alpha = 1 / Beta = 1374   |                                                                                                                                                        |
| Treated AF to Disabling stroke– Month 13 onwards                                                  | 0.00% | Beta      | Alpha = 0 / Beta = 1375   |                                                                                                                                                        |
| <b>Other clinical events rates for both arms (TAVI and SAVR) – Annual risk</b>                    |       |           |                           |                                                                                                                                                        |
| Rehospitalisation – Month 13 onwards                                                              | 0.0%  | Gamma     | SD = 0.00% (assumption)   | SWEDEHEART registry (2018-2020) <sup>6</sup>                                                                                                           |
| Reintervention rate -Year 1 onwards                                                               | 0.1%  | Gamma     | SD = 0.01% (assumption)   |                                                                                                                                                        |
| <b>Relative risk of death associated with treated AF., DS. and reintervention – for both arms</b> |       |           |                           |                                                                                                                                                        |
| Treated AF                                                                                        | 1.46  | Lognormal | SD = 0.15<br>(assumption) | Odutayo et al. <sup>28</sup>                                                                                                                           |
| Disabling stroke                                                                                  | 2.3   | Lognormal | SD = 0.23<br>(assumption) | Dennis et al. <sup>29</sup>                                                                                                                            |
| Aortic reintervention                                                                             | 2.21  | Lognormal | SD = 0.22<br>(assumption) | PARTNER 3 trial <sup>9</sup><br>Procedural deaths (0.4%) compared to monthly mortality risk of general mortality for 73 years old <sup>a</sup> (0.16%) |
| <b>Disutilities associated to treated AF and disabling stroke – for both arms</b>                 |       |           |                           |                                                                                                                                                        |
| Utility decrement: Treated AF                                                                     | 0.08  | Gamma     | SD = 0.00<br>(assumption) | Lanitis et al. <sup>31</sup>                                                                                                                           |

|                                                                                      |             |       |                               |                                                                                         |
|--------------------------------------------------------------------------------------|-------------|-------|-------------------------------|-----------------------------------------------------------------------------------------|
| Utility decrement: Disabling stroke                                                  | 0.37        | Gamma | SD = 0.04<br>(assumption)     |                                                                                         |
| <b>Cost of the procedure (incl. rehabilitation)</b>                                  |             |       |                               |                                                                                         |
| TAVI with SAPIEN 3                                                                   | 302 329 SEK | Gamma | SD = 30232.92<br>(assumption) | Swedish Health Care Regions (2022) - Average of E03N across price lists for all regions |
| SAVR                                                                                 | 244 750 SEK | Gamma | SD = 24474.99<br>(assumption) | Swedish Health Care Regions (2022) - Average of E04E across price lists for all regions |
| <b>Monthly cost associated to health states (Alive &amp; well, Treated AF., DS.)</b> |             |       |                               |                                                                                         |
| Treated AF up to 30 days                                                             | 55 561 SEK  | Gamma | SD = 5556.1<br>(assumption)   | Hallberg et al. <sup>30</sup>                                                           |
| Treated AF – Month 2 onwards                                                         | 2 111 SEK   | Gamma | SD = 211.1<br>(assumption)    |                                                                                         |
| Disabling stroke -up to 30 days                                                      | 106 165 SEK | Gamma | SD =10616.5<br>(assumption)   | Lanitis et al. <sup>31</sup>                                                            |
| Caregiver cost for disabling stroke -up to 30 days                                   | 69 491      | Gamma | SD =6949.1<br>(assumption)    |                                                                                         |
| Disabling stroke– Month 2 onwards                                                    | 4 284 SEK   | Gamma | SD = 428.4<br>(assumption)    |                                                                                         |
| Caregiver cost for disabling stroke - Month 2 onwards                                | 37 970 SEK  | Gamma | SD = 3797.0<br>(assumption)   |                                                                                         |

|                                                            |            |       |                             |                                                                                                              |
|------------------------------------------------------------|------------|-------|-----------------------------|--------------------------------------------------------------------------------------------------------------|
| Alive and well up to 1 year (both arms)                    | 8 215 SEK  | Gamma | SD = 821.5<br>(assumption)  | Swedish Health Care Regions (2022) -<br>Average of 'besök kardiolog' across<br>price lists for all regions   |
| Alive and well – Month 13 onwards (both arms)              | 8 215 SEK  | Gamma | SD = 821.5<br>(assumption)  |                                                                                                              |
| <b>Other costs considered in the model – for both arms</b> |            |       |                             |                                                                                                              |
| Monthly cost of pacemaker complications                    | 3 206 SEK  | Gamma | SD = 320.57<br>(assumption) | Swedish Health Care Regions (2022) -<br>Average of X31O across price lists for<br>all regions                |
| Rehospitalisation                                          | 61 340 SEK | Gamma | SD = 6133.9<br>(assumption) | Swedish Health Care Regions (2022) -<br>Average of E47A, E47C and E47E<br>across price lists for all regions |

AF, atrial fibrillation; AKI, acute kidney injury; MI, myocardial Infarction; SAVR, surgical aortic valve replacement; TAVI, transcatheter aortic valve implantation; TIA, transient ischaemic attack.
